# Supplementary material for: A membrane-free flow electrolyzer operating at high current density using earth-abundant catalysts for water splitting
Source: PubMed Central journal article supplement (PMC8260598; doi:10.1038/s41467-021-24284-5), 2021-07-06
Supplement: 41467_2021_24284_MOESM1_ESM.pdf [file 41467_2021_24284_MOESM1_ESM.pdf]

## Supplementary information

### **A membrane-free flow electrolyzer operating at high current density using earth-abundant catalysts for water splitting**

Xiaoyu Yan,<sup>1,3</sup> Jasper Biemolt,<sup>2</sup> Kai Zhao,<sup>1,3</sup> Yang Zhao,<sup>1</sup> Xiaojuan Cao,<sup>1,3</sup> Ying Yang,<sup>4</sup> Xiaoyu Wu,<sup>1,3</sup> Gadi Rothenberg,<sup>2</sup> and Ning Yan<sup>1,2,3,\*</sup>

<sup>1</sup> School of Physics and Technology, Wuhan University, Wuhan, China.

<sup>2</sup> Van` t Hoff Institute for Molecular Sciences (HIMS), University of Amsterdam, Amsterdam, The Netherlands.

<sup>3</sup> Suzhou Institute of Wuhan University, Suzhou, China.

<sup>4</sup> Hubei Key Laboratory of Theory and Application of Advanced Materials Mechanics, Wuhan University of Technology, Wuhan, China.

\*To whom the correspondence should be addressed: ning.yan@whu.edu.cn

---

Supplementary information includes:

**1. Supplementary Tables .....3**

**2. Supplementary Figures .....7**

## 1. Supplementary Tables

**Supplementary Table 1:** Comparison of OER overpotentials with selected high-performance electrocatalysts at 10 mA cm<sup>-2</sup> and 50 mA cm<sup>-2</sup> in 1.0 M KOH solutions.

| Catalyst                                       | $\eta_{=10}$<br>(mV) | $\eta_{=50}$<br>(mV) | References                                 |
|------------------------------------------------|----------------------|----------------------|--------------------------------------------|
| NiMoOx/NiMoS                                   | 186                  | 206                  | Nat. Commun., 2020, 11, 5462-5474          |
| <b>FeP-CoP/NC/CC</b>                           | <b>201</b>           | <b>319</b>           | <b>This work</b>                           |
| p-Cu <sub>1-x</sub> NNi <sub>3-y</sub> /FeNiCu | 280                  | 352                  | Nat. Commun., 2018, 9, 2326                |
| Ni <sub>3</sub> FeN                            | 280                  | 345                  | Adv. Energy Mater., 2016, 6, 1502333       |
| Ni <sub>3</sub> N nanosheets                   | 290                  | 333                  | Angew. Chem. Int. Ed., 2016, 55, 8670-8674 |
| Ni <sub>2</sub> P                              | 290                  | n.g.                 | Energy Environ. Sci., 2015, 8, 2347-2351.  |
| Co-Bi NS/G nanosheets                          | 290                  | 345                  | Angew. Chem. Int. Ed., 2016, 55, 2488      |
| CoM-P-3DHFLMs                                  | 292                  | 400                  | Appl. Catal. B, 2019, 249 147–154          |
| Amorphous CoSe film                            | 292                  | 351                  | Chem. Commun., 2015, 51, 16683-16686       |
| Zn doped CoO                                   | 293                  | 341                  | ChemCatChem, 2019, 11, 1480–1486           |
| $\alpha$ -Co <sub>4</sub> Fe(OH)x              | 295                  | 350                  | J. Mater. Chem., A 2017, 5, 1078           |
| SCFW <sub>0.4</sub>                            | 296                  | n.g.                 | J. Mater. Chem. A, 2018, 6, 9854-9859      |
| CoSe <sub>0.85</sub>                           | 300                  | 325                  | Adv. Mater., 2016, 28, 77-85               |
| CoFe LDH-F                                     | 300                  | n.g.                 | Adv. Mater. Interfaces, 2019, 10, 1409     |
| boronized Ni                                   | 300                  | 330                  | J. Mater. Chem. A, 2019, 7, 5288-5294      |
| CoFe LDH/NF                                    | 300                  | 390                  | ChemPlusChem, 2017, 82, 483                |
| Poled Co <sub>2</sub>                          | 320                  | n.g.                 | Nat. Commun., 2016, 8, 14430               |
| CoMnP                                          | 330                  | n.g.                 | J. Am. Chem. Soc., 2016, 138, 4006-4009    |
| Co <sub>4</sub> N                              | 330                  | 370                  | J. Am. Chem. Soc., 2015, 137, 4119-4125    |
| p-SnNiFe                                       | 350                  | 445                  | Nat. Commun., 2017, 8, 934                 |
| NiFe@NC                                        | 360                  | n.g.                 | Nano Energy., 2017, 39, 245–252            |

Note: n.g. indicates not given or obtainable in the literature.

**Supplementary Table S2:** Comparison of HER overpotentials of FeP-CoP/NC/CC with selected high-performance electrocatalysts at 10 mA cm<sup>-2</sup> and 50 mA cm<sup>-2</sup> in 1.0 M KOH solutions.

| Catalyst                                                   | $\eta=10$<br>(mV) | $\eta=50$<br>(mV) | References                                   |
|------------------------------------------------------------|-------------------|-------------------|----------------------------------------------|
| <b>FeP-CoP/NC/CC</b>                                       | <b>52</b>         | <b>81</b>         | <b>This work</b>                             |
| Ir-NSG                                                     | 18.5              | n.g               | Nat. Commun., 2020, 11, 1-11                 |
| NiMoOx/NiMoS                                               | 38                | 67                | Nat. Commun., 2020, 11, 5462-5474            |
| Pt-Ni NWS-S/C                                              | 59                | n.g               | Nat. Commun., 2017, 8, 14580                 |
| Co-Fe-P                                                    | 66                | 210               | Nano Energy., 2019, 56, 225-233              |
| FLNPC@MoP-NC/MoP-C/CF                                      | 69                | 156               | Adv. Funct. Mater., 2018, 28                 |
| Mn-Co-P/Ti                                                 | 76                | 121               | ACS Catal., 2017, 7, 98-102                  |
| np-(Co <sub>0.52</sub> Fe <sub>0.48</sub> ) <sub>2</sub> P | 79                | 98                | Energy Environ. Sci., 2016, 9, 2257          |
| CoP/NPC/TF                                                 | 80                | 148               | J. Mater. Chem. A, 2018, 6, 6282             |
| V-Ni <sub>2</sub> P NSAs/CC                                | 85                | 275               | Nanoscale, 2019, 11, 4198-4203               |
| Ni <sub>0.33</sub> Co <sub>0.67</sub> S <sub>2</sub>       | 88                | 181               | Adv. Energy Mater., 2015, 5, 1402031         |
| CoP/Ti                                                     | 90                | 127               | Chem. Mater., 2014, 26, 4326                 |
| NFP/C-3                                                    | 95                | 150               | Sci. Adv., 2019, 5, 6009                     |
| FePSe <sub>3</sub> /NC                                     | 118               | 175               | Nano Energy., 2019, 57, 222-229              |
| CoMoS <sub>3</sub> nanotubes                               | 133               | 270               | J. Mater. Chem. A, 2017, 5, 11309            |
| CoS <sub>2</sub> NW                                        | 145               | 190               | J. Am. Chem. Soc., 2014, 136, 10053          |
| CoP/Co <sub>2</sub> P/Co                                   | 160               | n.g.              | ACS Appl. Mater., Interfaces 2018, 10, 15673 |
| NiS <sub>2</sub> -MoS <sub>2</sub> hetero-nanowires        | 160               | 210               | J. Mater. Chem. A, 2016, 4, 13439-13443      |
| Co/CoP-5                                                   | 175               | 320               | Adv. Energy Mater., 2017, 7, 1602355         |

Note: n.g. indicates not given or obtainable in the literature.

**Supplementary Table S3:** Comparison of the applied voltage FeP-CoP/NC/CC with selected high-performance electrocatalysts at 10 mA cm<sup>-2</sup> and 50 mA cm<sup>-2</sup> in 1.0 M KOH.

| Catalyst                                           | V <sub>=10</sub><br>(V) | V <sub>=50</sub><br>(V) | References                                         |
|----------------------------------------------------|-------------------------|-------------------------|----------------------------------------------------|
| NiMoO <sub>x</sub> /NiMoS                          | 1.46                    | 1.55                    | Nat. Commun., 2020, 11, 5462-5474                  |
| Ni-ZIF/NiB                                         | 1.54                    | 1.73                    | Adv. Energy Mater., 2020 10, 1902714               |
| <b>FeP-CoP-CN/CC</b>                               | <b>1.56</b>             | <b>1.67</b>             | <b>This work (no iR compensation)</b>              |
| Mo-Co <sub>9</sub> S <sub>8</sub> @C               | 1.56                    | 1.95                    | Adv. Energy Mater., 2020 10, 1903137               |
| Ni/Ni(OH) <sub>2</sub>                             | 1.59                    | 1.68                    | Adv. Mater., 2020, 32, 1906915                     |
| O-CoP                                              | 1.61                    | 1.75                    | Adv. Funct. Mater., 2020, 30, 1905252              |
| CoP flower/CC                                      | 1.61                    | 1.71                    | J. Mater. Chem. A, 2020, 8, 7626-7632              |
| Fe(0.2)/Ni-M@C-400-2h                              | 1.62                    | 1.75                    | ACS Appl. Mater. Interfaces, 2020, 12, 55782–55794 |
| IrP <sub>2</sub> /NPC                              | 1.62                    | 1.78                    | ACS Appl. Mater. Interfaces 2019, 11, 16461-16473  |
| CoP/Ni foam                                        | 1.62                    | 1.69                    | Adv. Funct. Mater., 2015, 25,7337–7347             |
| FCP@NG                                             | 1.63                    | 1.83                    | Nanoscale, 2019, 11, 12837–12845                   |
| CoFeZr oxides/NF                                   | 1.63                    | 1.75                    | Adv. Mater. 2019, 31, 1901439                      |
| Ni-Pi/CF                                           | 1.63                    | 2.15                    | Adv. Funct. Mater., 2016, 26, 4067–4077            |
| Ni <sub>2</sub> Fe <sub>1</sub> -O                 | 1.64                    | 1.79                    | Adv. Energy Mater., 2018, 81701347                 |
| MoS <sub>2</sub> -NiS <sub>2</sub> /NGF            | 1.64                    | n.g.                    | Appl. Catal., B 2019,254, 15–25                    |
| NiCo <sub>2</sub> S <sub>4</sub> -4                | 1.64                    | 1.78                    | Adv. Funct. Mater. 2019, 29, 1807031               |
| CoP/NCNHP                                          | 1.64                    | 1.77                    | Adv. Mater. 2019, 31, 1808167                      |
| CVN/CC                                             | 1.64                    | 1.92                    | Appl. Catal., B 2019, 241, 521–527                 |
| Co-P film                                          | 1.64                    | 1.71                    | Angew. Chem. Int. Edl. 2015,54, 6251-6254          |
| Ni foam–supported Ni/Mo <sub>2</sub> C (1:2)-NCNFs | 1.64                    | n.g.                    | Adv. Energy Mater. 2019, 9, 1803185                |
| Ni <sub>3</sub> S <sub>2</sub>                     | 1.65                    | 1.78                    | Nanoscale, 2019, 11, 5646-5654                     |
| Co <sub>0.85</sub> Se/NiFe-LDH                     | 1.67                    | n.g.                    | Energ. Environ. Sci., 2016, 9, 478-483             |
| Co <sub>1</sub> Mn <sub>1</sub> CH/NF              | 1.68                    | 1.86                    | J. Am. Chem. Soc., 2017, 139,8320–8328             |
| Co <sub>9</sub> S <sub>8</sub> /WS <sub>2</sub>    | 1.68                    | 1.82                    | J. Mater. Chem. A, 2017, 5, 23361-23368            |
| Fe <sub>0.4</sub> Co <sub>0.6</sub>                | 1.68                    | 1.72                    | Nano Energy, 2017, 38, 576-584                     |
| CoP/rGO-400                                        | 1.70                    | n.g.                    | Chem. Sci., 2016, 7, 1690-1695                     |
| NESSP//NESS                                        | 1.74                    | 1.92                    | Adv. Mater., 2017, 29, 1702095                     |
| CC/CNTs@CoS <sub>0.74</sub> Se <sub>0.52</sub>     | 1.74                    | 1.88                    | ChemSusChem, 2019, 12, 3792 – 3800                 |
| NiFeOF/Ni foam                                     | 1.80                    | n.g.                    | ACS Catal., 2017, 7, 8406–8412                     |
| PPy/FeTCPP/Co                                      | 1.81                    | n.g.                    | Adv. Funct. Mater., 2017, 27, 1606497              |
| NiCoFeB                                            | 1.81                    | 1.89                    | Small, 2019, 15, 1804212                           |

Note: n.g. indicates not given or obtainable in the literature.

**Supplementary Table S4: Minerals in the tap water used in this work**

| Sequence number | Test index (mg L <sup>-1</sup> )                     | Index limit (mg L <sup>-1</sup> ) | Test result (mg L <sup>-1</sup> ) |
|-----------------|------------------------------------------------------|-----------------------------------|-----------------------------------|
| 1               | total hardness (Ca <sup>2+</sup> +Mg <sup>2+</sup> ) | 450                               | 138~179                           |
| 2               | solid solution                                       | 1000                              | 161~240                           |
| 3               | M(SO <sub>4</sub> ) <sub>x</sub>                     | 250                               | 36.2~44.7                         |
| 4               | RCl <sub>x</sub>                                     | 250                               | 21.5~30.4                         |
| 5               | NO <sub>3</sub> -N                                   | 10                                | 1.59~2.11                         |
| 6               | R(MnO <sub>4</sub> ) <sub>x</sub>                    | 5                                 | 1.26~2.56                         |
| 7               | Fe <sup>x+</sup>                                     | 0.3                               | 0.013~0.017                       |
| 8               | anion detergent                                      | 0.3                               | 0.05                              |
| 9               | Al <sup>3+</sup>                                     | 0.2                               | 0.044~0.107                       |
| 10              | Mn <sup>3+</sup>                                     | 0.1                               | 0.0001~0.0072                     |
| 11              | RF <sub>x</sub>                                      | 1.0                               | 0.16~0.22                         |
| 12              | Cu <sup>x+</sup>                                     | 1.0                               | 0.0005~0.0024                     |
| 13              | Zn <sup>2+</sup>                                     | 1.0                               | 0.001~0.009                       |
| 14              | CH <sub>3</sub> Cl                                   | 0.06                              | 0.023                             |
| 15              | R(CN) <sub>x</sub>                                   | 0.05                              | 0.002                             |
| 16              | Cr <sub>2</sub> O <sub>7</sub> <sup>-</sup>          | 0.05                              | 0.004                             |
| 17              | As <sup>x+</sup>                                     | 0.01                              | 0.0010~0.0018                     |
| 18              | Se <sup>x+</sup>                                     | 0.01                              | 0.0005~0.0006                     |
| 19              | Pb <sup>x+</sup>                                     | 0.01                              | 0.0001                            |
| 20              | Cd <sup>x+</sup>                                     | 0.005                             | 0.0001                            |
| 21              | CCl <sub>4</sub>                                     | 0.002                             | 0.0001                            |
| 22              | Hg <sup>x+</sup>                                     | 0.001                             | 0.00005                           |

## 2. Supplementary Figures

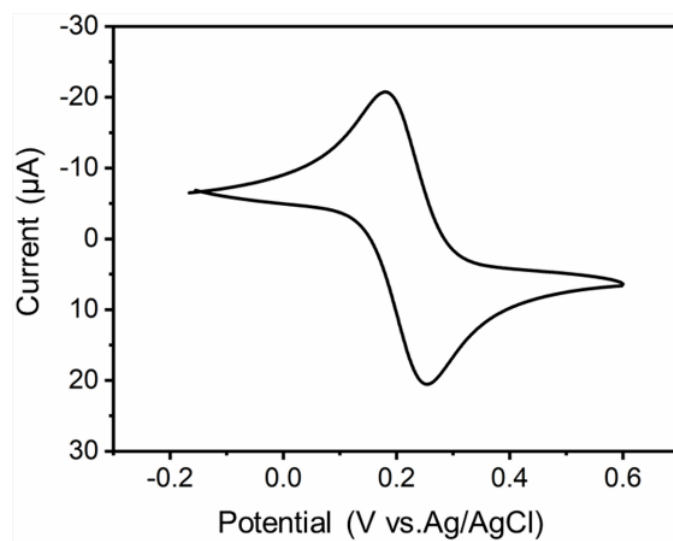

**Supplementary Figure 1:** CV of GC electrode in 1.0 mM  $\text{K}_3\text{Fe}(\text{CN})_6$  + 1.0 mM  $\text{K}_4\text{Fe}(\text{CN})_6$  + 0.1 M KCl at  $5 \text{ mV s}^{-1}$  for calibration.

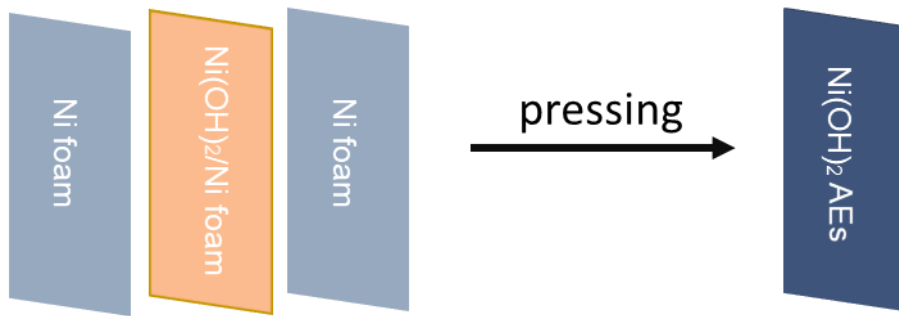

**Supplementary Figure 2:** The preparation process and structure of the AE.



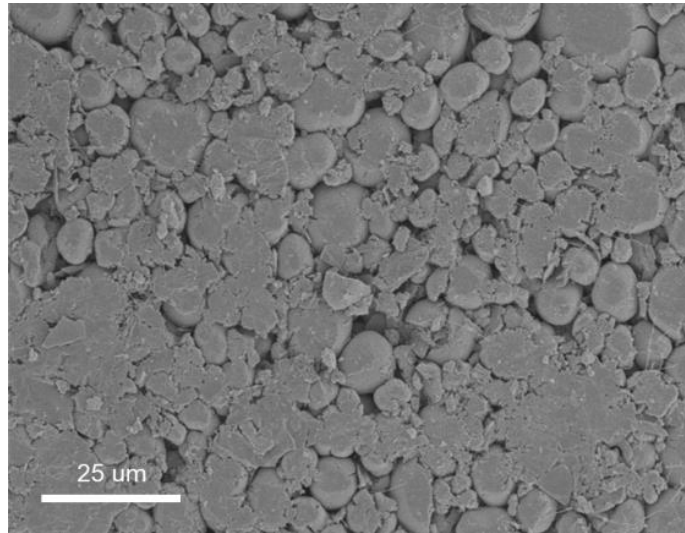

**Supplementary Figure 3:** SEM image of Ni(OH)<sub>2</sub> in a AE.

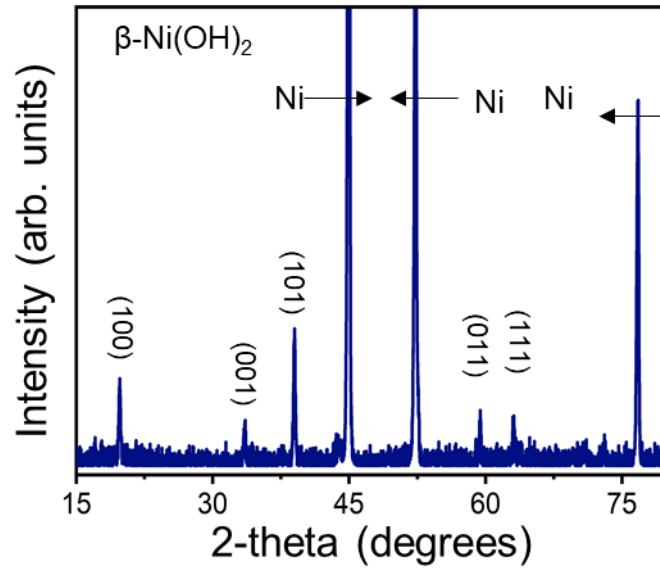

**Supplementary Figure 4:** XRD pattern of AE; three main peaks corresponds to the Ni form matrix where as the remaining peaks belong to  $\text{Ni(OH)}_2$ .

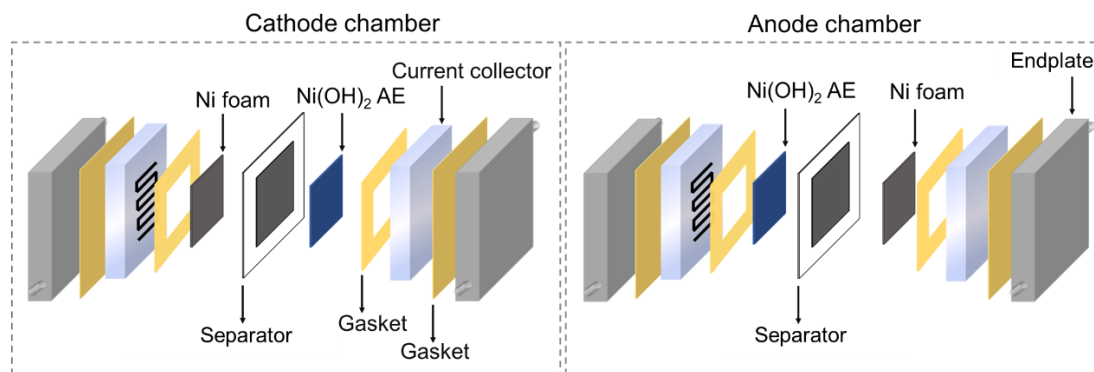

**Supplementary Figure 5:** The original assembly of MFE before activation.

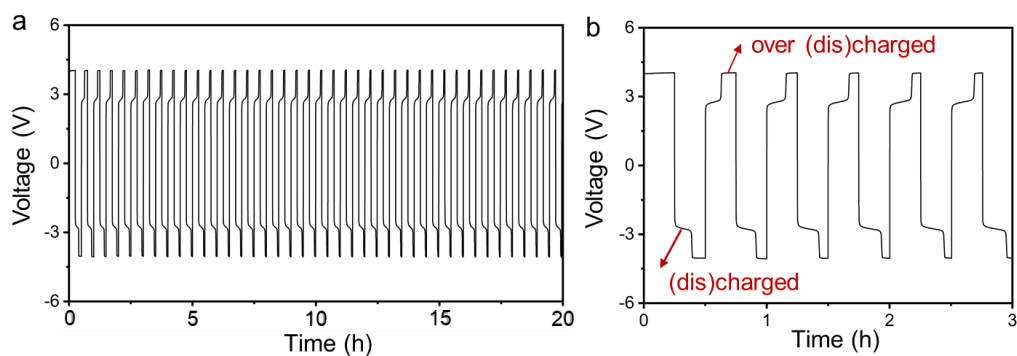

**Supplementary Figure 6:** Activation process of AEs in MFE, current is  $\pm 250$  mA, temperature is  $35$  °C and flow rate is  $50$  ml  $\text{min}^{-1}$ .

Charge/discharge process:

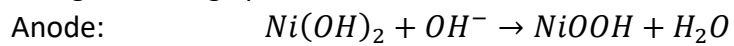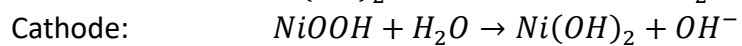

Overcharge/discharge process:

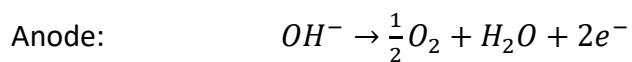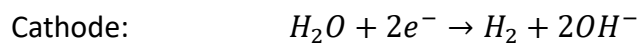

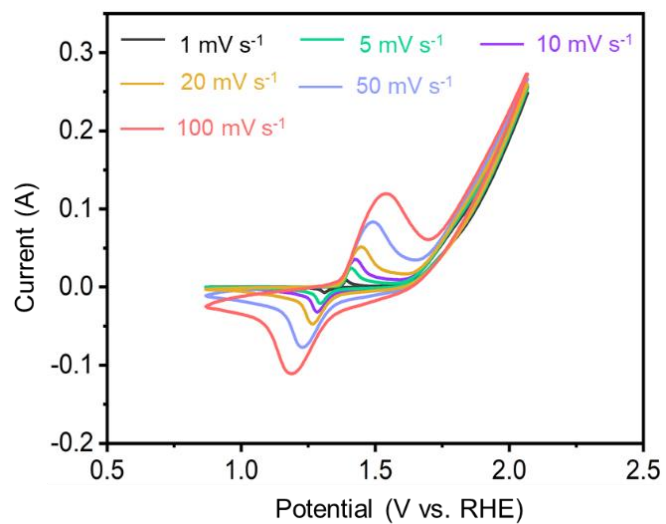

**Supplementary Figure 7:** CVs of a activated Ni(OH)<sub>2</sub> electrode at various scan rates. The redox behavior of NiOOH/Ni(OH)<sub>2</sub> is visible.

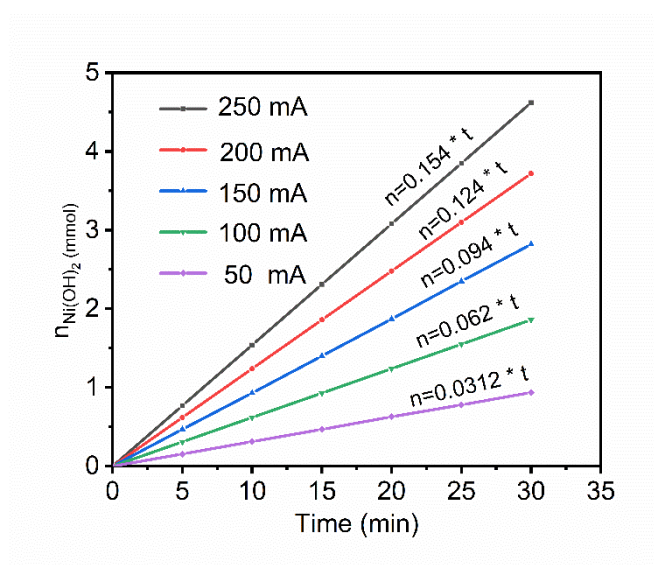

**Supplementary Figure 8:** The molar conversion of  $\text{Ni(OH)}_2$  in MFE as a function of time at various currents.

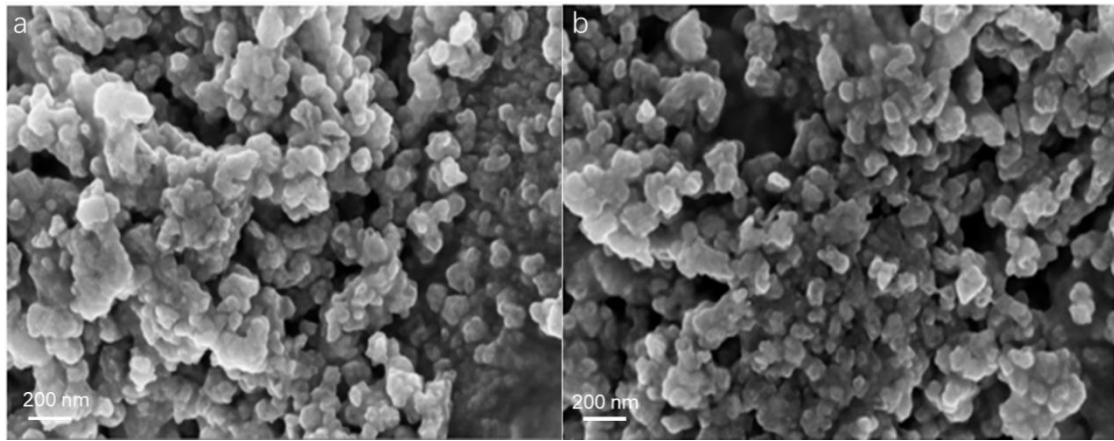

**Supplementary Figure 9:** SEM images of (a) Fe-Co bimetallic alloy/NC and (b) FeP-CoP/NC after phosphidation.

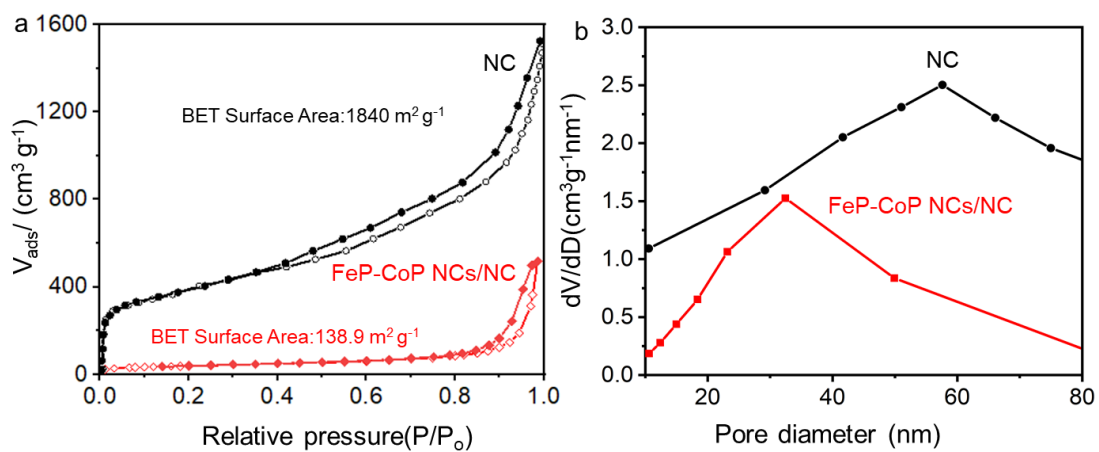

**Supplementary Figure 10:** The comparison of (a) N<sub>2</sub> adsorption isotherms and (b) pore size distribution of FeP-CoP/NC and NC.



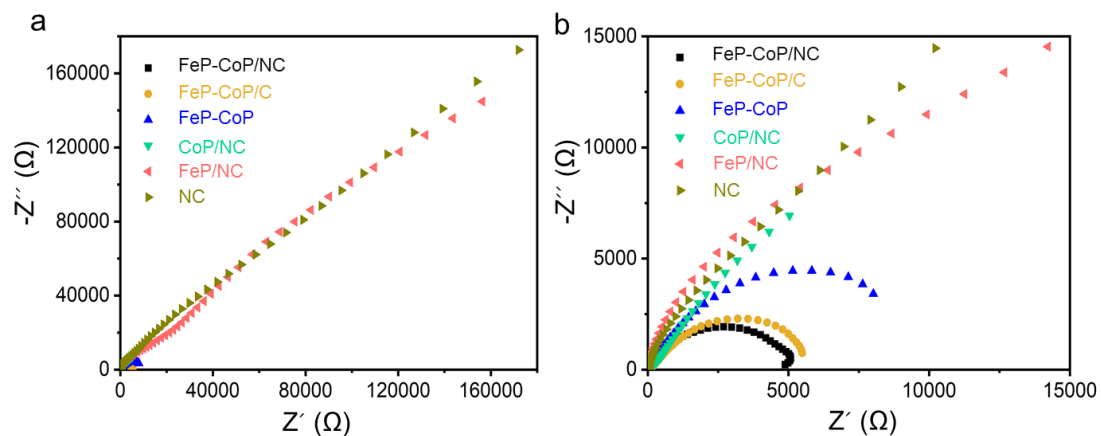

**Supplementary Figure 11:** EIS spectra of FeP-CoP/NC, FeP-CoP/C, FeP-CoP, CoP/NC, FeP /NC and NC in a 3-electrode system at open circuit condition. Electrolyte is  $N_2$ -saturated 1.0 M KOH.

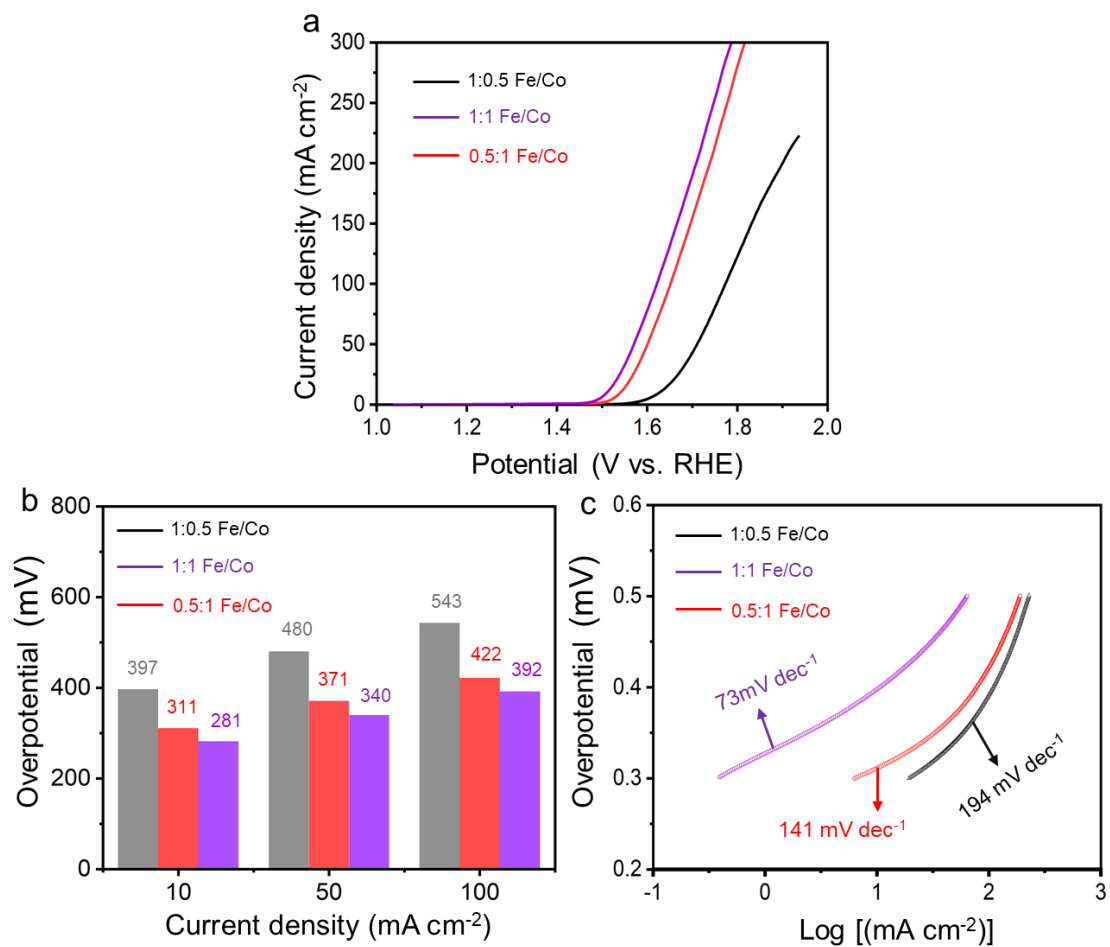

**Supplementary Figure 12:** Electrochemical performance of FeP-CoP/NC in OER with various Fe/Co ratio.

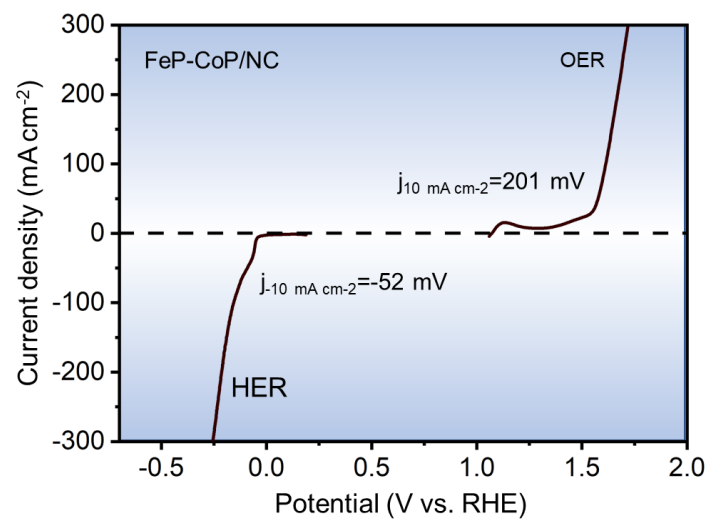

**Supplementary Figure 13:** The OER and HER performance of FeP-CoP/NC/CC in 1.0 M KOH solutions.

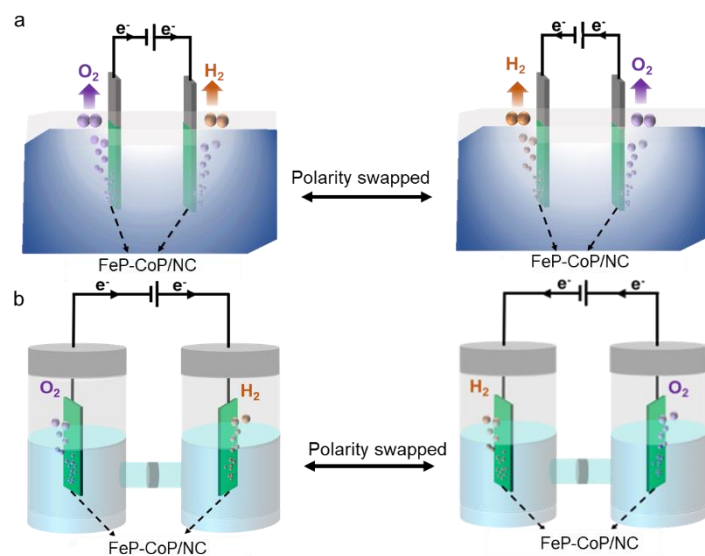

**Supplementary Figure 14:** The schematic assembly of (a) single-compartment cell and (b) H-cell for alkaline water splitting in this work.

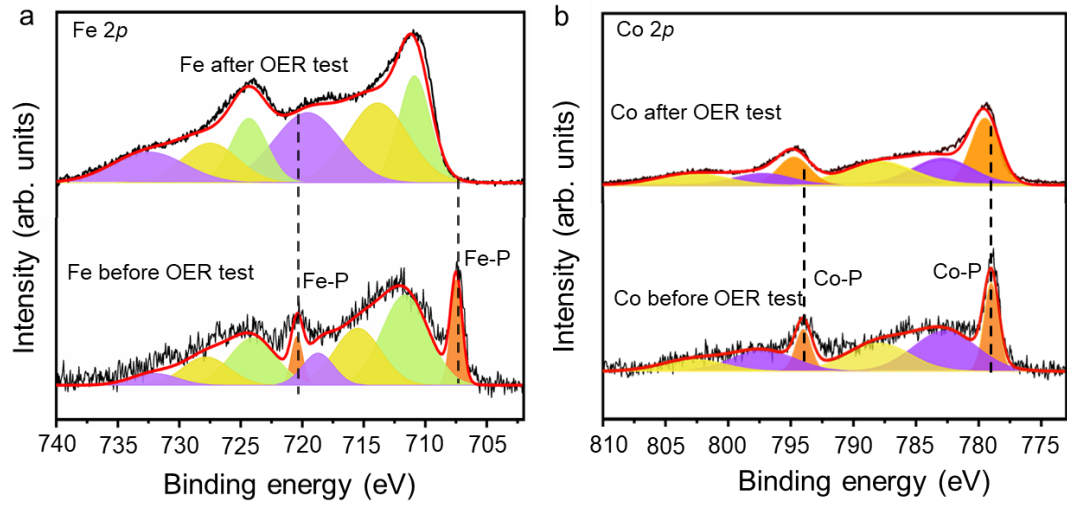

**Supplementary Figure 15:** high resolution XPS spectra of (a) Fe 2p and (b) Co 2p in FeP-CoP/NC before and after HER/OER cycle.

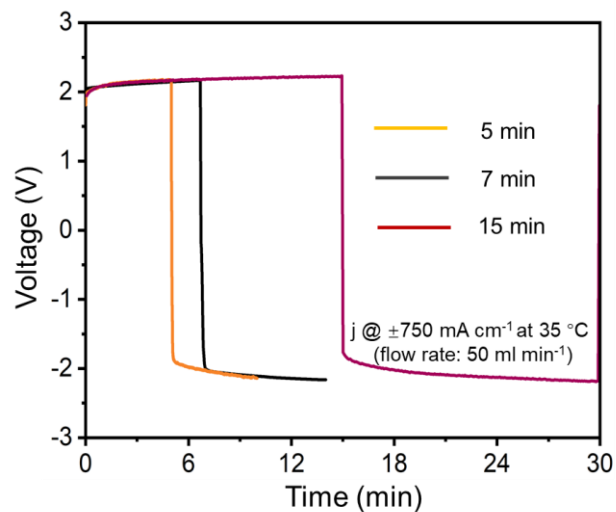

**Supplementary Figure 16:** Performance of MFE when the time per cycle is varied.

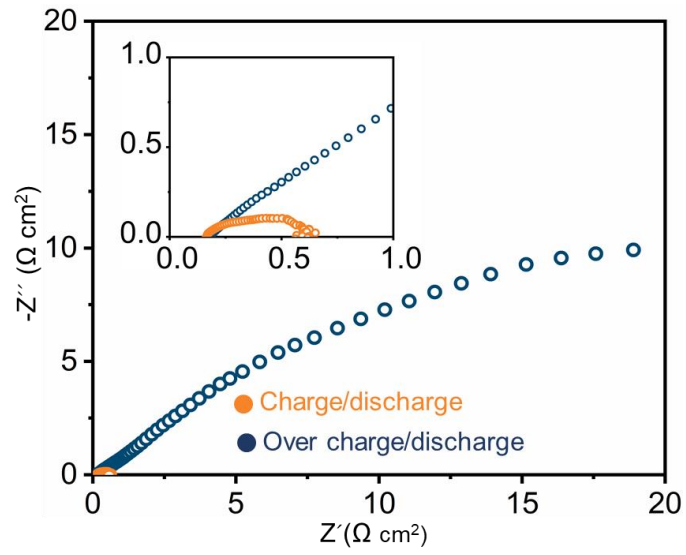

**Supplementary Figure 17:** The comparison of EIS spectra for a normal MFE and a MFE which is over (dis)charged.

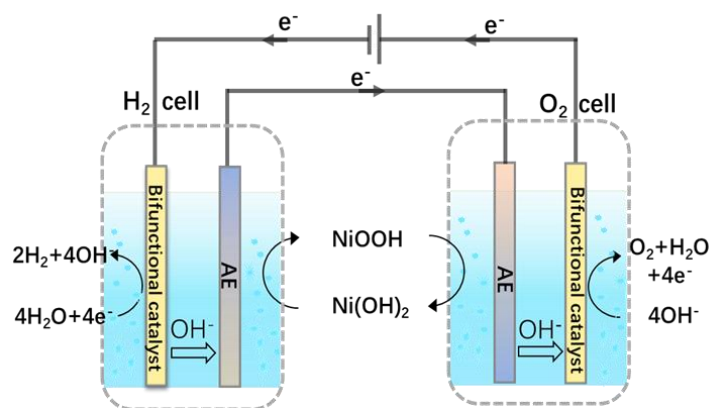

**Supplementary Figure 18:** The schematic of the electrolyzer using NiOOH/Ni(OH)<sub>2</sub> redox couple without flowing and MEA structure.



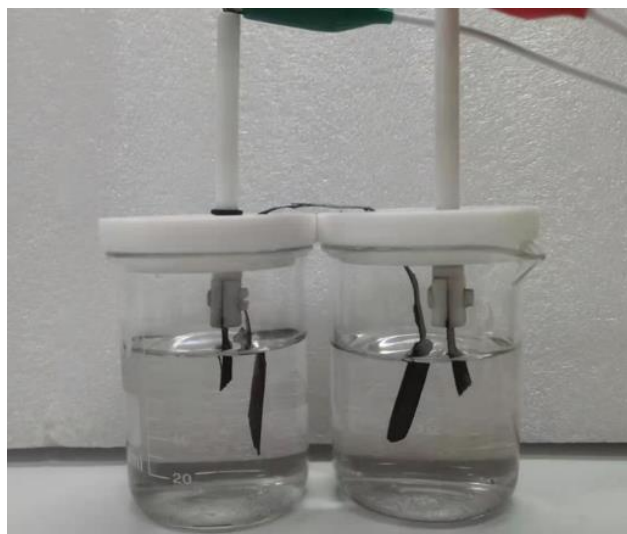

**Supplementary Figure 19:** Photograph of the conventional decoupled electrolyzer using  $\text{NiOOH}/\text{Ni}(\text{OH})_2$  redox couple.

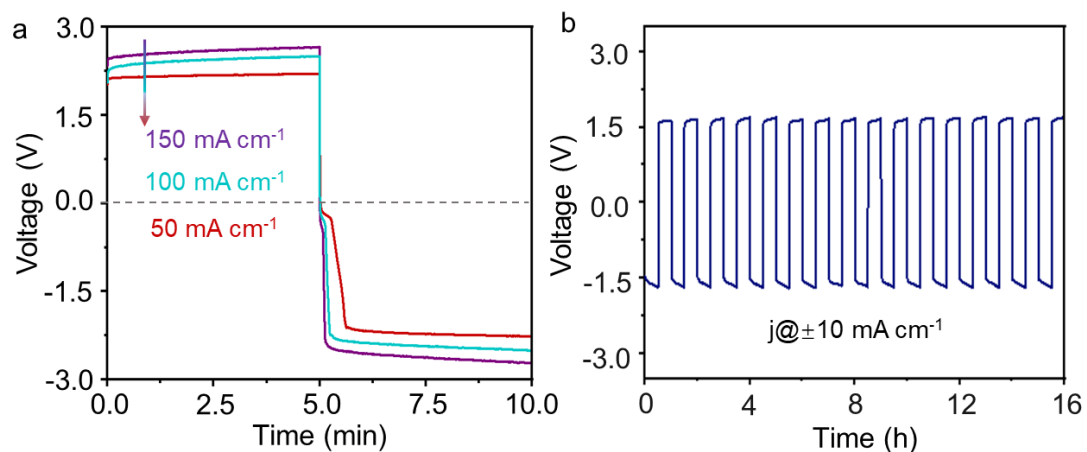

**Supplementary Figure 20:** (a) The  $V-t$  curve at  $\pm 10 \text{ mA cm}^{-2}$ ; (b) Cyclic stability test at  $\pm 10 \text{ mA cm}^{-2}$  in conventional electrolyzer using redox couples. Temperature is  $35 \text{ }^\circ\text{C}$ . Both anolyte and catholyte are  $1.0 \text{ M KOH}$  solutions. The cycle stability lowered by 10% from first cycle to the sixteen cycle.

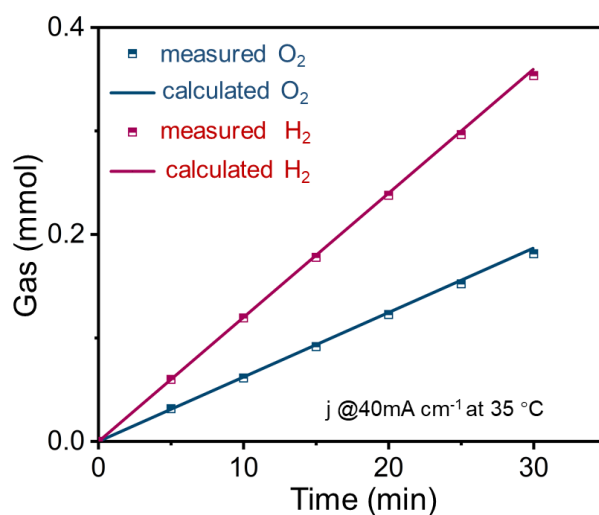

**Supplementary Figure 21:** Measured H<sub>2</sub> and O<sub>2</sub> yields in conventional electrolyzer using redox couples, solids lines represent the gas evolution at 100% Faradaic efficiency at current density of 40 mA cm<sup>-2</sup>. Both anolyte and catholyte are 1.0 M KOH solutions. After 30 min, 0.353 mmol of H<sub>2</sub> has been measured, which was close to the theoretical value (0.356 mmol). The calculated Faradaic efficiency was 96.2%.

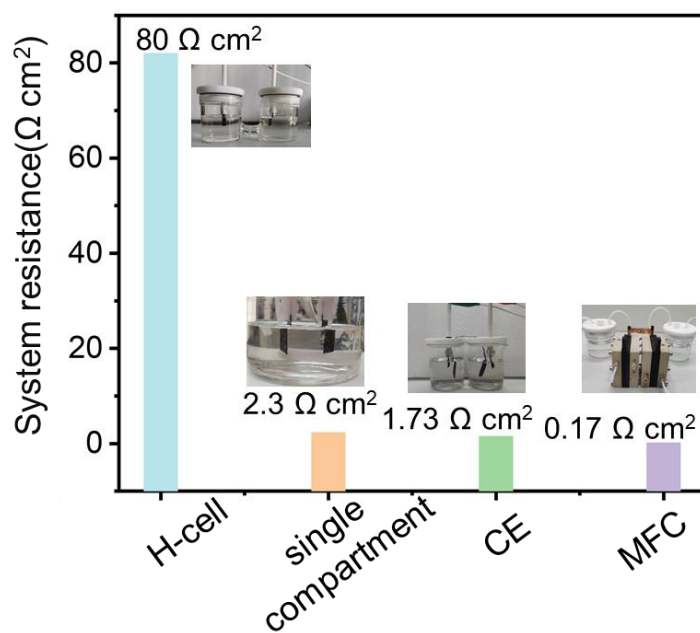

**Supplementary Figure 22:** The internal ohmic resistance of cells with different architectures (H-cell, single-compartment, electrolyzer using NiOOH/Ni(OH)<sub>2</sub> redox couple without flowing and sandwiched electrode structure), all electrodes are employed with FeP-CoP/NC catalysts in 1.0 M KOH solutions.

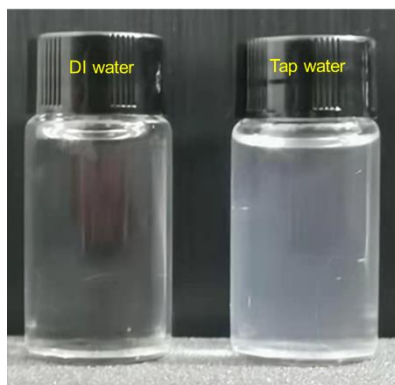

**Supplementary Figure 23:** The photograph of deionized water (left) and tap water electrolyte (right), Note the precipitation in the tap water electrolyte after adding KOH.

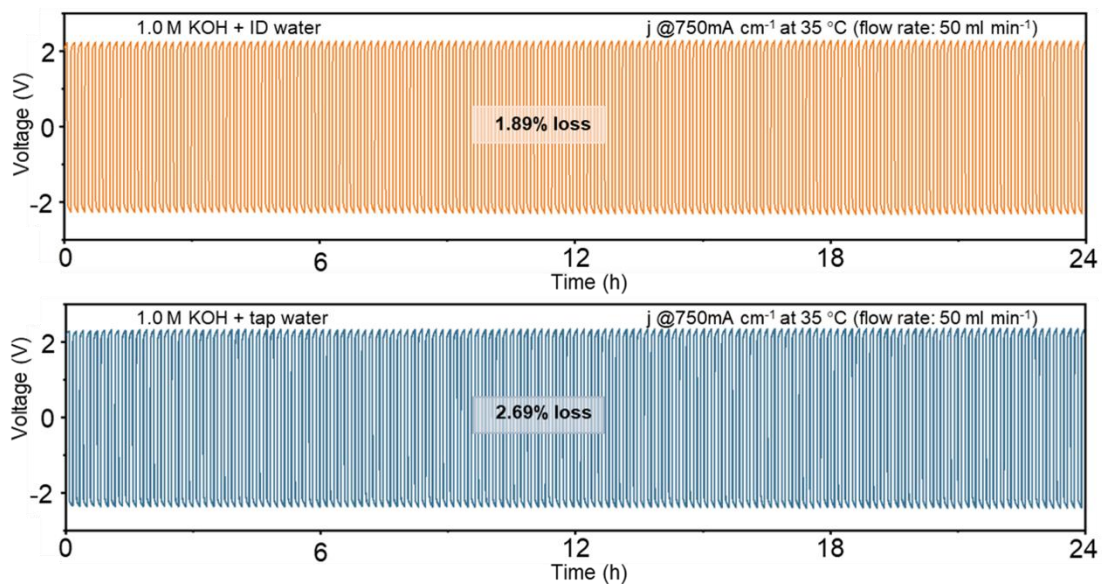

Supplementary Figure 24: Rescaled plots of the cyclic stability test of MFE in Figure 5c and 5d.

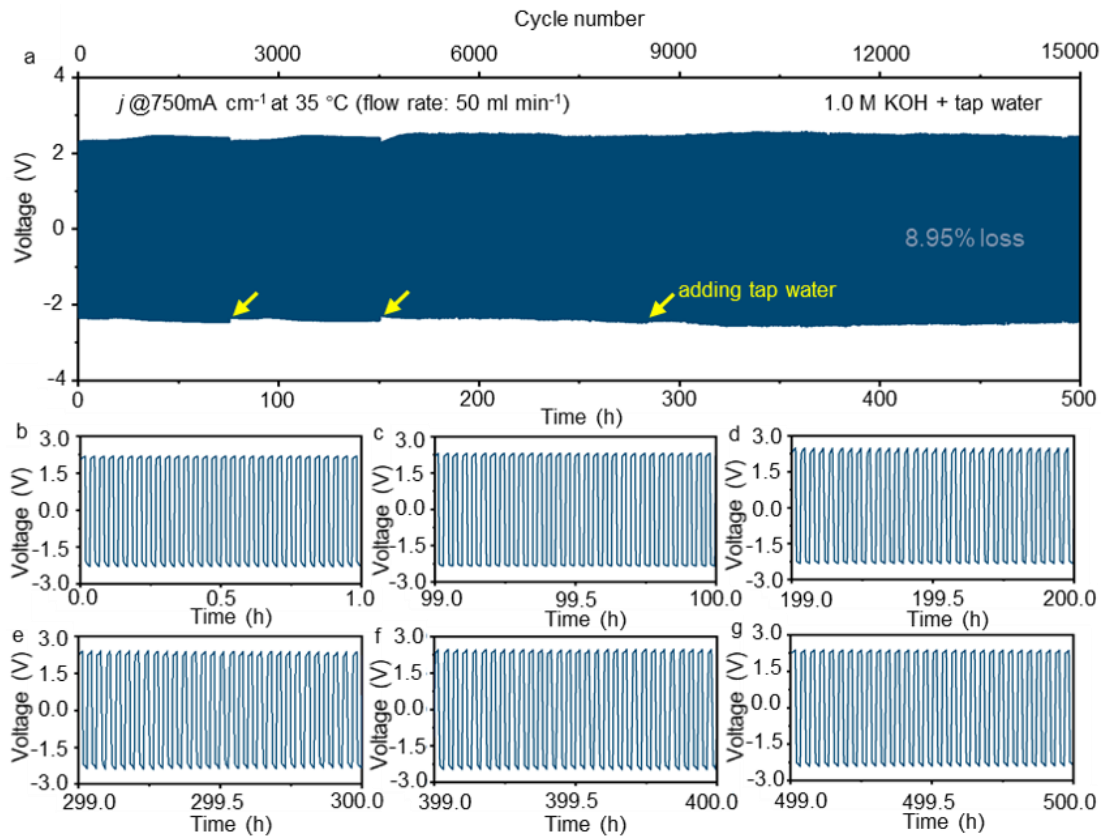

**Supplementary Figure 25:** A 500 h longevity test of MFE in tap water electrolyte. For the evaluation of the cyclic stability of the auxiliary electrode, 2 min per cycle was applied to achieve a higher cycle number.
